# Supplementary material
Source: publisher figshare collection journal article supplement (https://gsajournals.figshare.com/ndownloader/files/17710718)
Supplement: Supplementary file 1 [file 17710718]

**TABLE S2**

**Optical mapping - Individual molecules report**

| For each sample, optical mapping method and labelling enzyme, the average N50 in Megabasepairs (Mb) as well as |
| --- |
| the label density, defined as the average number of labels per 100 kilobasepair (kb) interval, was listed. As additional proxy for DNA molecule length, DNA quality and achieved optical map lengths, the table also shows the cumulative number of Mb of DNA molecules longer than 20 kb, as well as from DNA molecules longer than 150 kb. |
